# Supplementary figures and images for: Molecular Epidemiological Investigation of Cyclospora spp. in Holstein Cattle in Partial Areas of the Yunnan Province, China
Source: MDPI journal article supplement (doi:10.3390/ani13091527), 2023-05-03

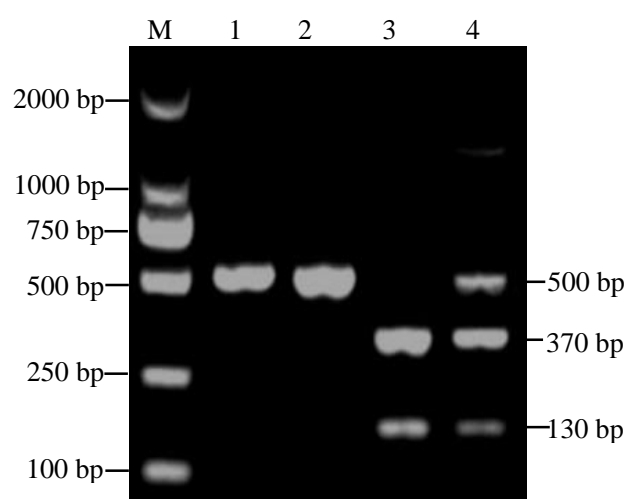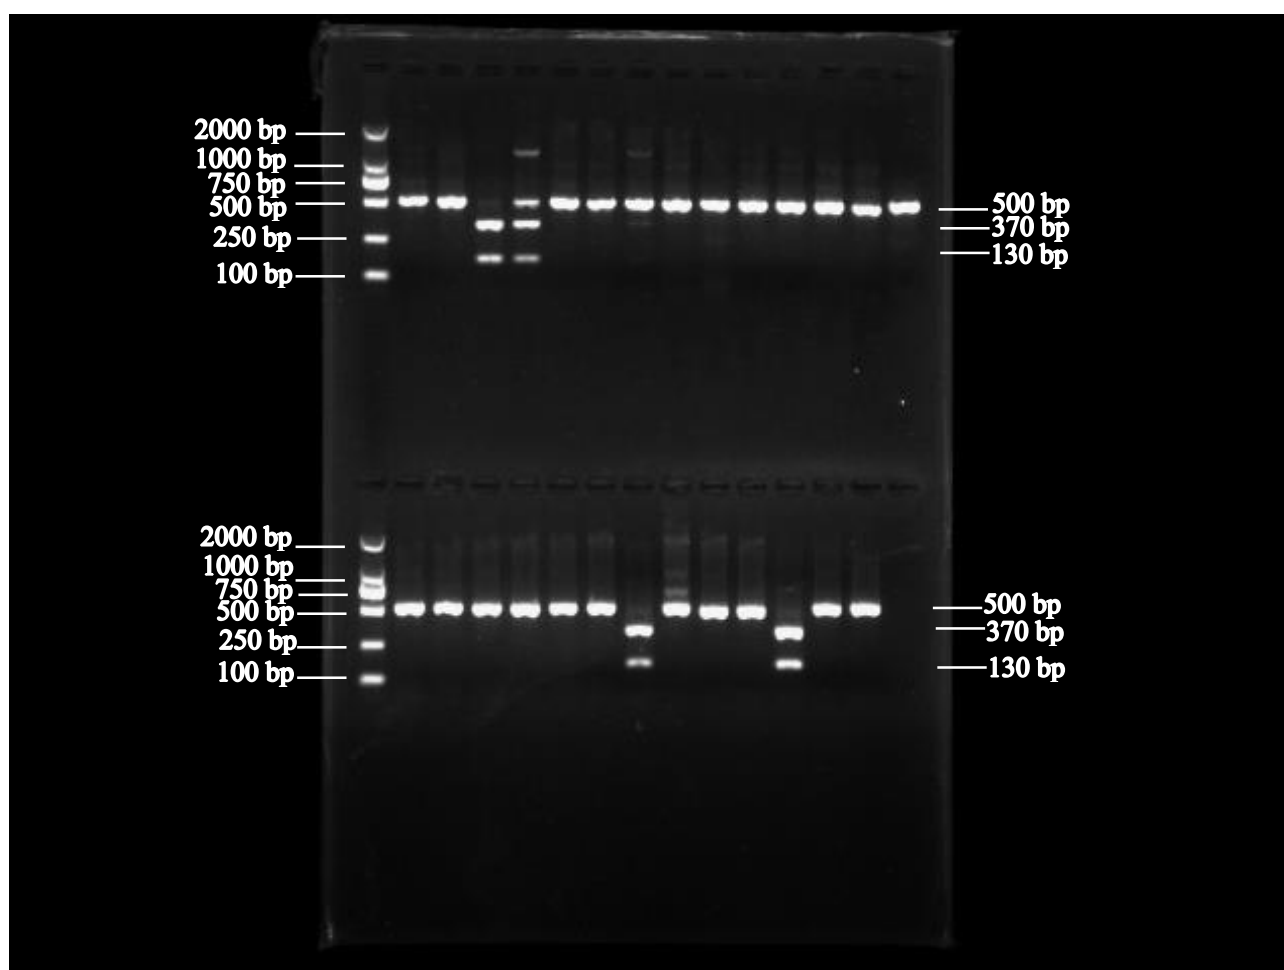

**Figure S1.** Original Western Blot Figure.

Supplement: s1 [file s1]
